# Supplementary material for: Characterization of interactions between organic molecules and Co-Al-LDH using photo-physical techniques
Source: Royal Society of Chemistry journal article supplement (doi:10.1039/c4ra00450g), 2014-01-01
Supplement: c4ra00450g1.pdf [file c4ra00450g1.pdf]

ELECTRONIC SUPPLEMENTARY INFORMATION FILE of the paper published on RSC Advances

**Electronic Supplementary Information for**  
**Characterization of interaction between organic molecules and**  
**Co-Al-LDH, using photo-physical techniques**

**BY**

Lei Li\*, Kongchao Zhao, Pengfei Liu, Kai Zhu

**ADDRESS** : State Key Laboratory of Chemical Resource Engineering, Beijing University  
of Chemical Technology, Beijing 100029, P. R. China

E-mail: lilei@mail.buct.edu.cn

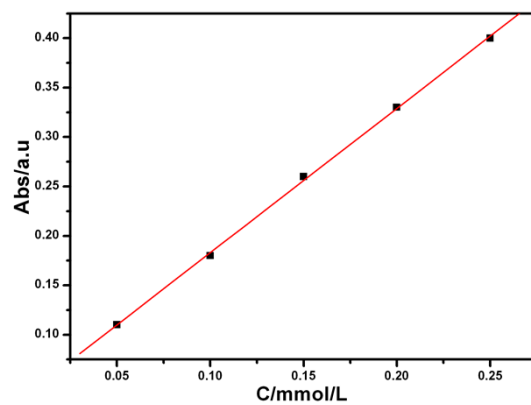

Fig.S1 Concentration-absorption curve of 4-BBA in 274nm

$$y = 1.46x + 0.037, \quad r = 0.99972$$

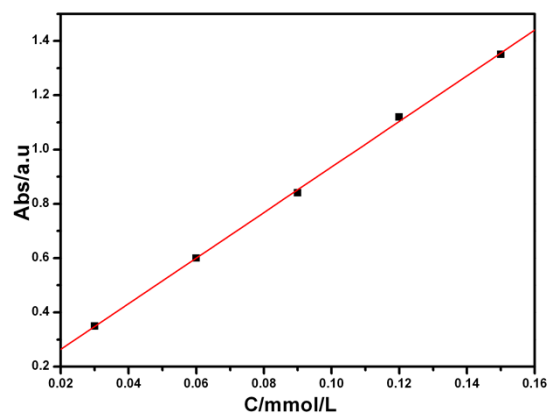

Fig.S2 Concentration-absorption curve of 4-BBA in 226nm

$$y = 8.4x + 0.096, \quad r = 0.99965$$

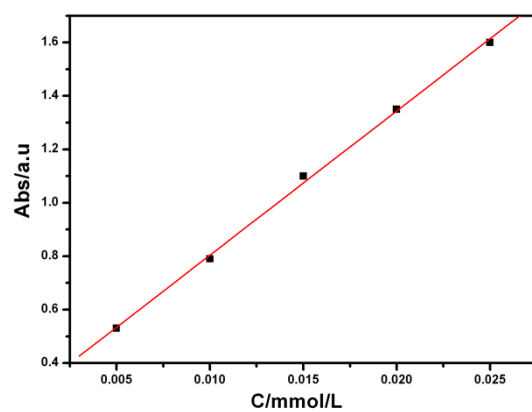

Fig.S3 Concentration-absorption curve of 2-NSA in 226nm

$$y = 54x + 0.264, \quad r = 0.99923.$$

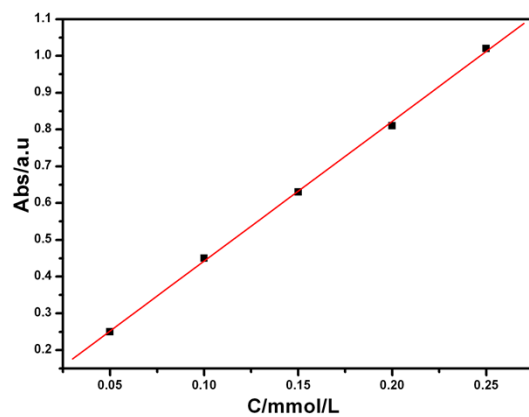

Fig.S4 Concentration-absorption curve of 2-NSA in 274nm

$$y = 3.8x + 0.062, \quad r = 0.99961$$

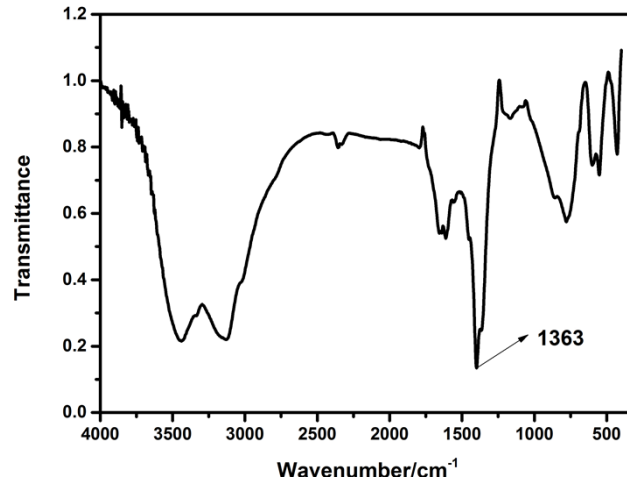

Fig.S5 FTIR spectra of Co-Al-CO<sub>3</sub>-LDH

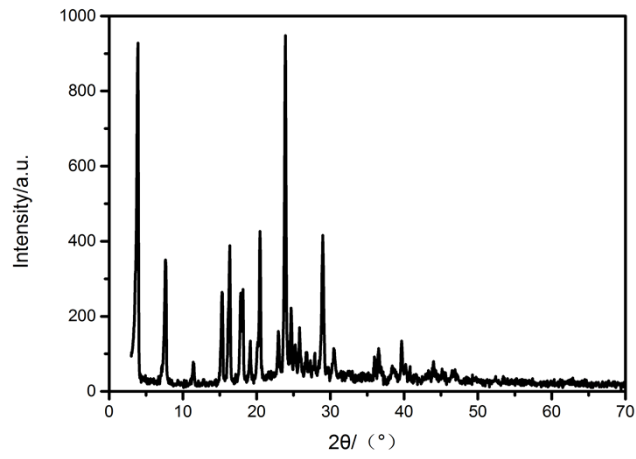

Fig.S6 XRD pattern of 4-BBA

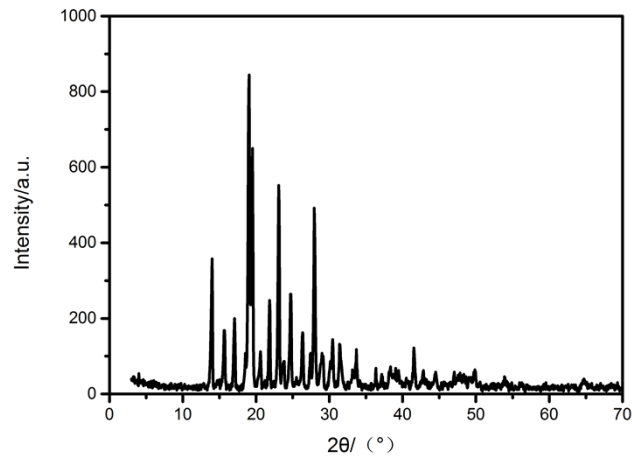

Fig.S7 XRD pattern of 2-NSA

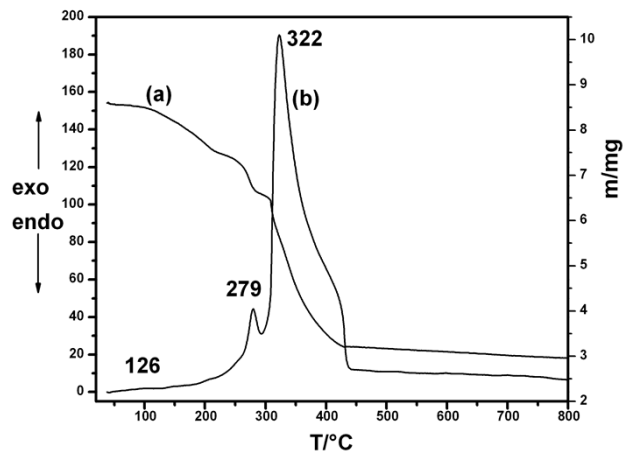

Fig. S8 TG-DTA curves of Co-Al-4-BBA-LDH  
(a)TG (b)DTA

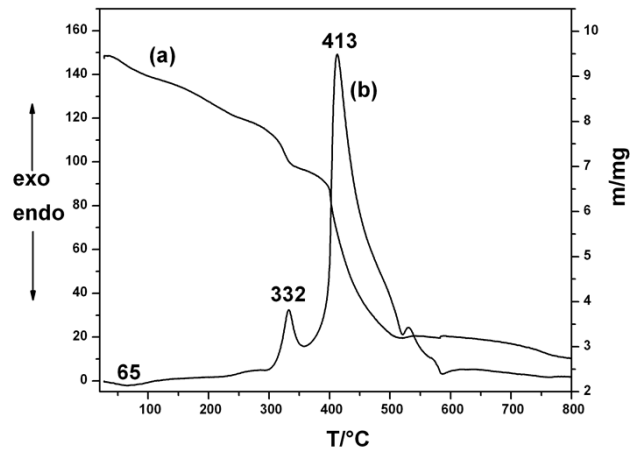

Fig. S9 TG-DTA curves of Co-Al-2-NSA-LDH  
(a)TG (b)DTA

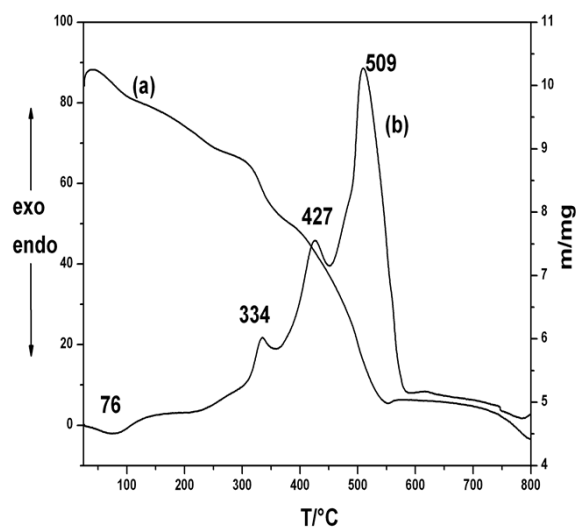

Fig. S10 TG-DTA curves of the co-intercalation compound  
(a)TG (b)DTA

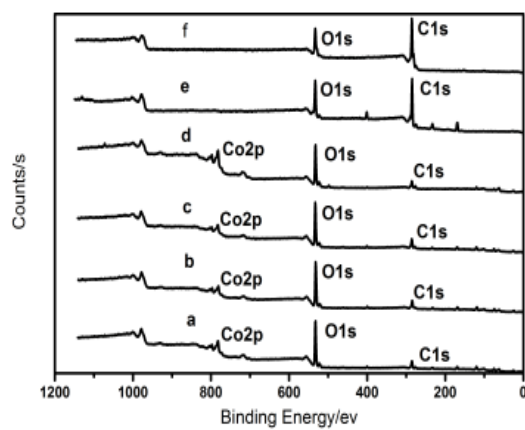

Fig. S11 The X-ray photoemission whole scan spectra for (a) Co-Al-4-BBA-2-NSA-LDH, (b) Co-Al-2-NSA-LDH, (c) Co-Al-4-BBA-LDH, (d)Co-Al-CO<sub>3</sub>-LDH, (e)2-NSA, (f)4-BBA

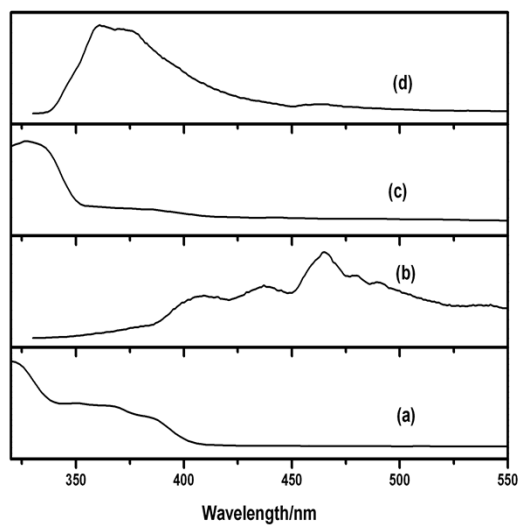

Fig.S12 The absorption and emission spectra of 4-BBA and 2-NSA  
 (a)4-BBA absorption (b)4-BBA emission ( $\lambda_{exc}=310\text{nm}$ )  
 (c)2-NSA absorption (d)2-NSA emission ( $\lambda_{exc}=310\text{nm}$ )

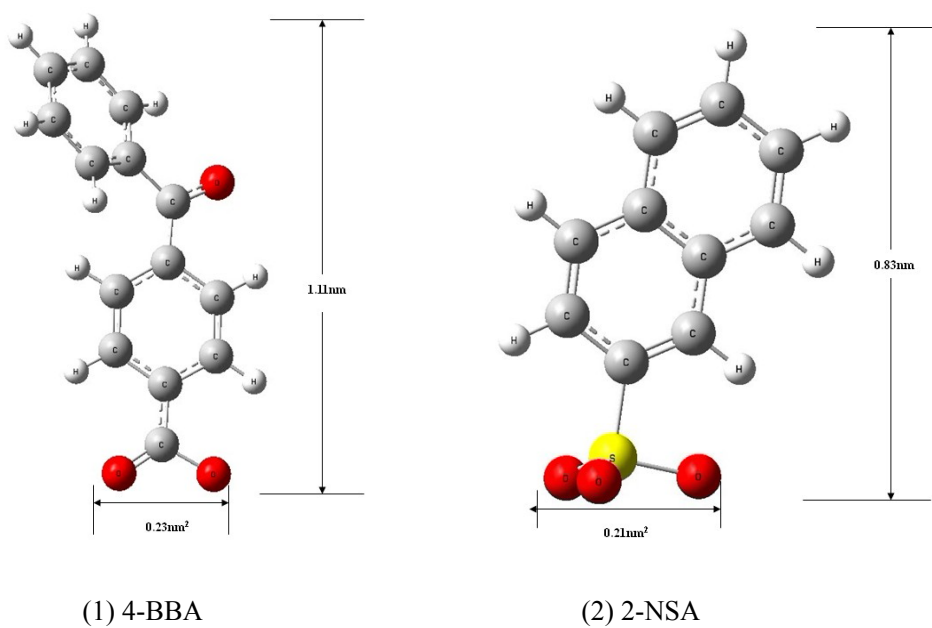

Fig.S13 Structure of each guest anion (1) 4-BBA (2) 2-NSA

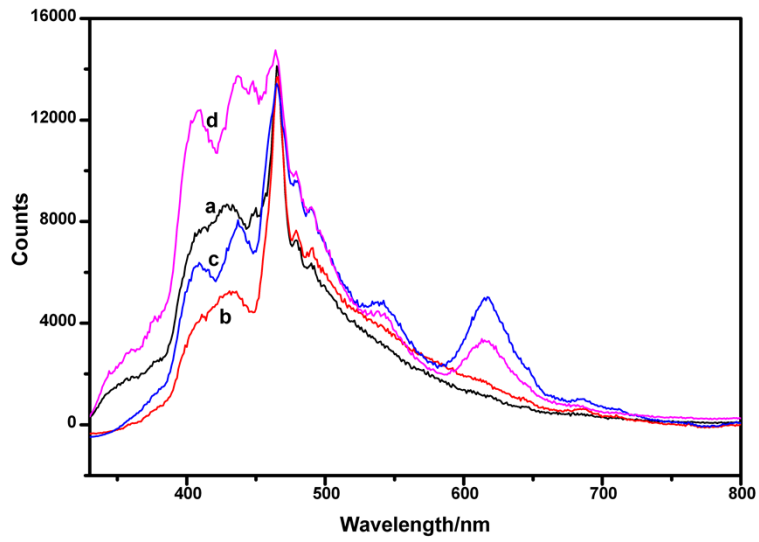

Fig.S14. Emission spectra of ( $\lambda_{exc}=310\text{nm}$ ) 4-BBA

a ---V-V b-----V-H c-----H-H d---H-V

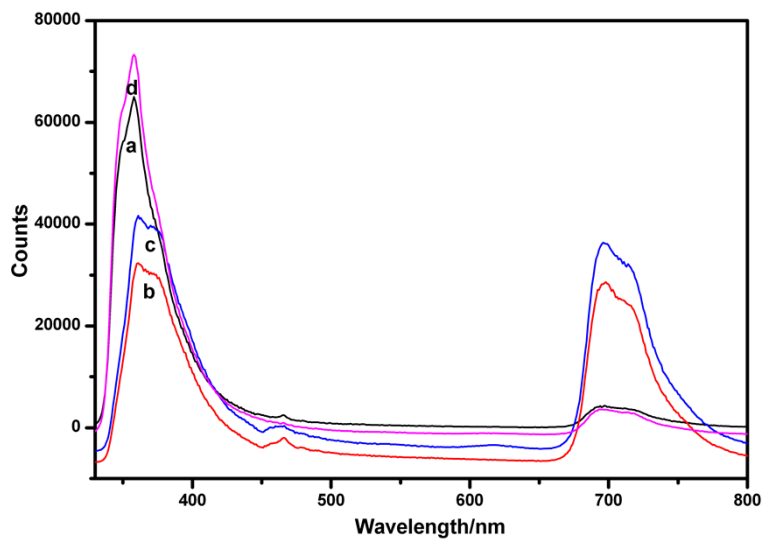

Fig.S15. Emission spectra of ( $\lambda_{exc}=310\text{nm}$ ) 2-NSA

a-----V-V b-----H-H c-----H-V d----V-H



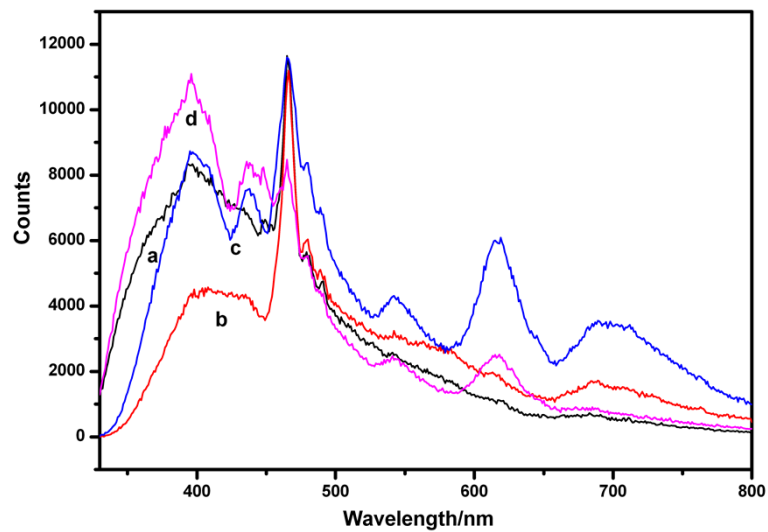

Fig.S16. Emission spectra of ( $\lambda_{exc}=310\text{nm}$ ) Co-Al-4-BBA-LDH

a-----V-V    b-----H-H    c-----H-V    d----V-H

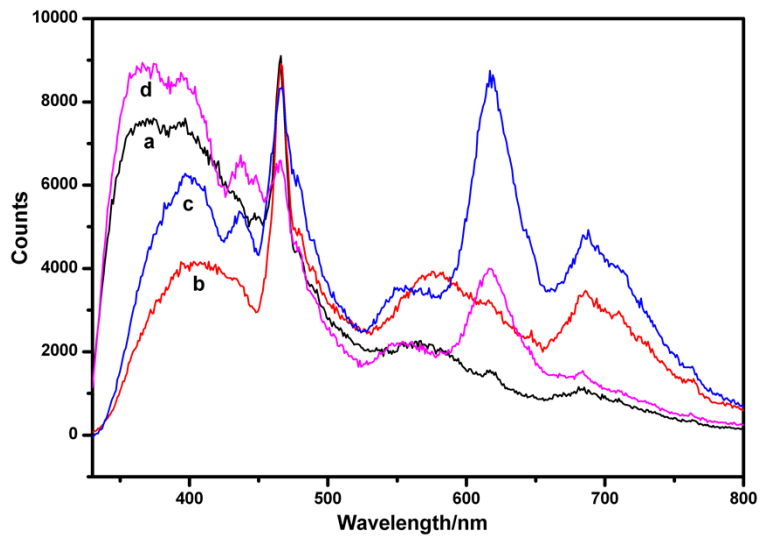

Fig.S17. Emission spectra of ( $\lambda_{exc}=310\text{nm}$ ) Co-Al-2-NSA-LDH

a-----H-H    b-----V-H    c-----H-V    d----V-V

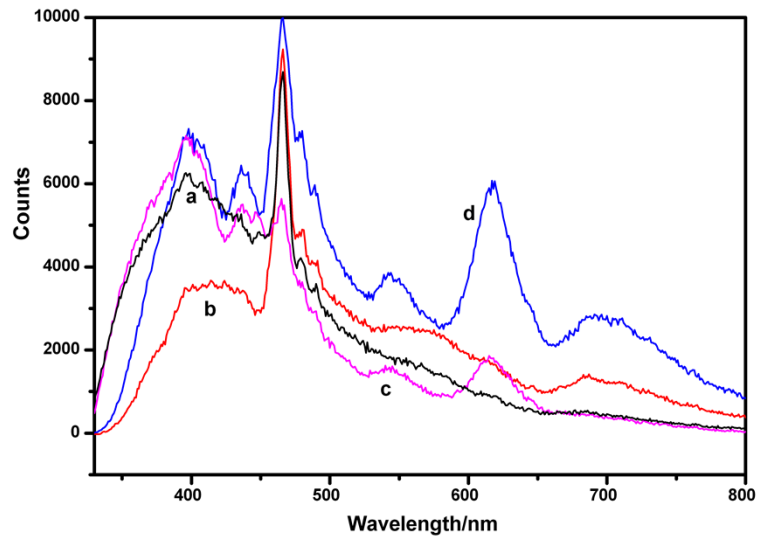

Fig.S18. Emission spectra of ( $\lambda_{exc}=310nm$ ) Co-Al-4-BBA-2-NSA-LDH

a-----H-H    b-----H-V    c-----V-H    d----V-V

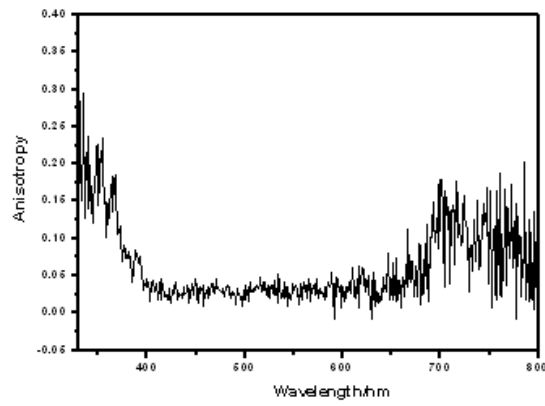

Fig.S19. Anisotropy traces of fluorescence of 4-BBA

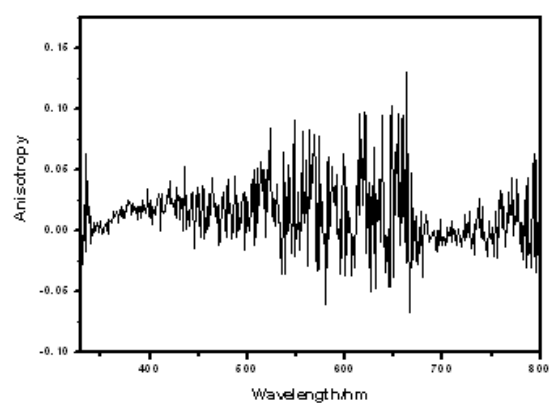

Fig.S20. Anisotropy traces of fluorescence of 2-NSA

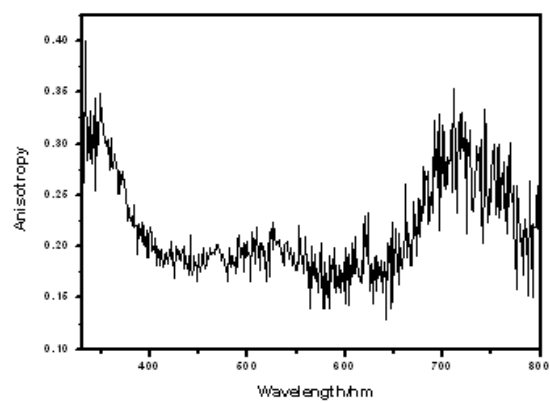

Fig.S21. Anisotropy traces of fluorescence of Co-Al-4-BBA-LDH

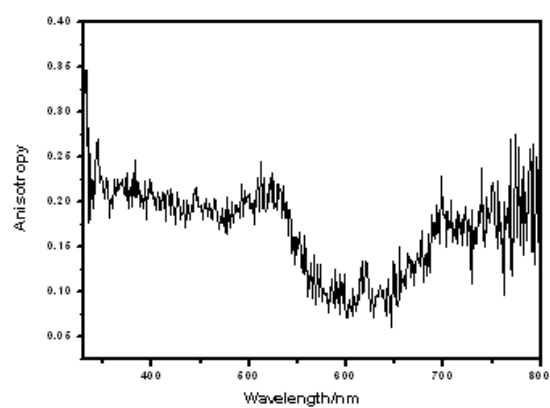

Fig.S22. Anisotropy traces of fluorescence of Co-Al-2-NSA-LDH

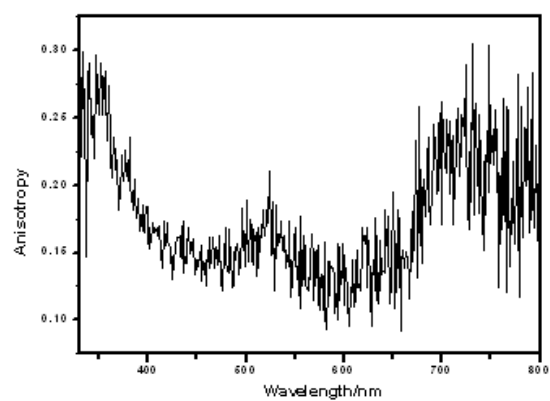

Fig.S23. Anisotropy traces of fluorescence of Co-Al-4-BBA-2-NSA-LDH
